# Supplementary material
Source: publisher figshare collection journal article supplement (https://sage.figshare.com/ndownloader/files/17961590)
Supplement: Supplementary file 1 [file 17961590]

**Supplementary Material**

Table S1

Factor loadings of the two-factor solution of the self-compassion scale.

| Item | Self-<br>reassurance | Self-<br>criticism | Item | Self-<br>reassurance | Self-<br>criticism |
|------|----------------------|--------------------|------|----------------------|--------------------|
| 1    | -.02                 | <b>.61</b>         | 14   | <b>.70</b>           | -.07               |
| 2    | -.01                 | <b>.79</b>         | 15   | <b>.66</b>           | -.01               |
| 3    | <b>.71</b>           | .16                | 16   | .06                  | <b>.71</b>         |
| 4    | -.07                 | <b>.63</b>         | 17   | <b>.60</b>           | -.22               |
| 5    | <b>.80</b>           | .15                | 18   | .00                  | <b>.55</b>         |
| 6    | .21                  | <b>.65</b>         | 19   | <b>.75</b>           | -.11               |
| 7    | <b>.72</b>           | .12                | 20   | .08                  | .74                |
| 8    | <b>.64</b>           | -.08               | 21   | -.13                 | <b>.65</b>         |
| 9    | <b>.71</b>           | -.05               | 22   | <b>.80</b>           | -.11               |
| 10   | <b>.77</b>           | .02                | 23   | .34                  | <b>-.43</b>        |
| 11   | -.05                 | <b>.66</b>         | 24   | -.03                 | <b>.71</b>         |
| 12   | <b>.69</b>           | .18                | 25   | -.02                 | <b>.75</b>         |
| 13   | .04                  | <b>.65</b>         | 26   | <b>.54</b>           | -.07               |

Notes: The principal factor method was used to extract factor loadings, parallel analysis was used to determine factor numbers, and the promax method was used for rotation. The inter-factorial correlation was -.24. The two-factor solution explained 48 percent of the total variance.
